1 **Parthenogenesis in weevils of the tribe Naupactini**  
2 **(Coleoptera, Curculionidae): a *Wolbachia*-density dependent**  
3 **trait?**

4

5 Lucía da Cruz Cabral<sup>1,2,#</sup>, Lucía Fernandez Goya<sup>1</sup>, Romina V. Piccinali<sup>1,2</sup>, Analía A.

6 Lanteri<sup>3</sup>, Viviana A. Confalonieri<sup>1,2</sup>, Marcela S. Rodriguero<sup>1,2\*</sup>

7

8 <sup>1</sup>Universidad de Buenos Aires. Facultad de Ciencias Exactas y Naturales, Departamento de

9 Ecología, Genética y Evolución. Ciudad Autónoma de Buenos Aires, Argentina

10 <sup>2</sup>CONICET - Universidad de Buenos Aires. Instituto de Ecología, Genética y Evolución (IEGEBE).

11 Ciudad Autónoma de Buenos Aires, Argentina

12 <sup>3</sup>División Entomología, Museo de La Plata, Facultad de Ciencias Naturales y Museo, Universidad

13 Nacional de La Plata-CONICET, Argentina

14

15 # Current address: Universidad Tecnológica Nacional, Facultad Regional Chubut (UTN-FRCh), Av.

16 del Trabajo 1536, Puerto Madryn, Chubut, Argentina

17

18 \* Corresponding author

19 rodriguero@ege.fcen.uba.ar (MSR)

## 21 **Abstract**

22 The intracellular bacteria *Wolbachia pipientis* can manipulate host reproduction to enhance their  
23 vertical transmission. It has been reported an association between parthenogenesis and *Wolbachia*  
24 infection in weevils from the tribe Naupactini. A curing experiment suggested that a threshold density  
25 of *Wolbachia* is required for parthenogenesis to occur. The aim of this study was to analyze  
26 *Wolbachia* infection status in the bisexual species *Naupactus xanthographus* and *Naupactus*  
27 *dissimulator*.

28 *Wolbachia* infection was detected in both species from some geographic locations, not being  
29 fixed. In all positive cases, faint PCR bands were observed. Quantification through real time PCR  
30 confirmed that *Wolbachia* loads in bisexual species were significantly lower than in parthenogenetic  
31 ones; this strengthens the hypothesis of a threshold level. Strain typing showed that both species carry  
32 *wNau1*, the most frequent in parthenogenetic Naupactini weevils. These infections seem to be  
33 recently acquired by horizontal transfer. *Wolbachia* was located throughout the whole body, which  
34 reinforce the idea of recent transmission. Moreover, we demonstrated that this strain carries the WO  
35 phage.

36 Finally, the analysis of eubacterial *16S rRNA* gene showed intense PCR bands for both  
37 bisexual species, suggesting –the presence of additional bacteria. Interspecific competition might  
38 explain why the parthenogenetic phenotype is not triggered.

39

40 **Keywords:** *Wolbachia*; Naupactini; Weevils; Thelytokous Parthenogenesis; *Wolbachia* Titers;  
41 Interacting Microbiota

## 43 **1. Introduction**

44 The obligate intracellular Gram-negative bacteria *Wolbachia pipientis* (Rickettsiales:  
45 Anaplasmataceae) is the most widespread endosymbiont in nature, infecting arthropods and filarial  
46 nematodes [1]. It is mainly transmitted vertically by females, but horizontal transfer is also extensive  
47 [2]. *Wolbachia* is able to manipulate host reproduction by inducing several disorders including  
48 cytoplasmic incompatibility, feminization of genetic males, embryonic and larval male killing and  
49 thelytokous parthenogenesis [3]. These reproductive alterations give a selective advantage to the  
50 bacterium, enhancing infection spread [1]. Nevertheless, *Wolbachia* can play plenty of roles in  
51 symbiotic associations, such as production of nutrients or resistance against pathogens [4]. It has been  
52 suggested that *Wolbachia* tissue localization may be important in relation to function [5]. Infection is  
53 not restricted to reproductive organs, different studies have detected that *Wolbachia* can colonize  
54 diverse somatic tissues such as muscle, digestive tract, brain, fat body and the hemolymph [5-10].

55 It has been stated that *Wolbachia*-induced host phenotypes are deeply influenced by bacterial  
56 titers [1,5,11-14]. For instance, a two-step mechanism of parthenogenesis reported for parasitoid  
57 wasps (i.e. diploidization of the unfertilized egg followed by feminization) occurs only if  
58 *Wolbachia* exceeds a density threshold within eggs [15]. However, complete understanding of the  
59 association between phenotype and *Wolbachia* density remains unclear.

60 *Wolbachia*-induced parthenogenesis (WIP) is only confirmed in host taxa with haplo-diploid sex  
61 determination, although it is suspected in a small number of diplo-diploid species, as springtails and  
62 weevils [16-20]. The strong overrepresentation of haplo-diploid species with WIP could be due to an  
63 ascertainment bias and may not necessarily represent a biological pattern [21]. This could be related  
64 to the difficulties to formally demonstrate WIP in taxa with diplo-diploid sex determination systems  
65 because curing experiments lead to sterility rather than to restoration of sexuality as in haplo-diploid  
66 species [16,18-20,22]. Most probably, the mechanism to ensure parthenogenetic reproduction is quite  
67 different from those proposed for wasps and thrips, e.g. egg diploidization via gamete duplication.

68        Considering its particular properties, *Wolbachia* is being studied as a potential tool for control  
69 of insect pests and pathogens of insect-borne diseases [5]. Therefore, it is considered a novel  
70 alternative to combine with other existing strategies for Integrated Pest Management in an  
71 environmentally friendly way [23]. So, any knowledge on new strains, like those inducing  
72 parthenogenesis in diplo-diploid arthropods, may be welcome in order to provide new ideas to  
73 develop more effective control strategies.

74        The tribe Naupactini comprises more than 500 species of weevils distributed mostly in Central  
75 and South America. Several species within this group reproduce parthenogenetically like *Naupactus*  
76 *cervinus* [24], and many others were proposed as presumably parthenogenetic on the basis of female-  
77 biased sex ratios such as *Pantomorus postfasciatus* [25]. It has been reported an association between  
78 this reproductive mode and *Wolbachia* infection, with parthenogenetic species or populations being  
79 *Wolbachia*-infected, while unisexual species or population are not [17,26]. The molecular mechanism  
80 behind this striking pattern is still unknown. However, a recent curing experiment performed on *P.*  
81 *postfasciatus* suggested that a threshold density of *Wolbachia* is required for parthenogenesis to occur  
82 [18]. Considering this, we wondered if the bisexual species previously described as uninfected were  
83 actually free of this bacterial infection. It is possible that bisexual species harbor lower densities than  
84 those required for triggering parthenogenesis. Indeed, bacterial loads may be too small to be detected  
85 by conventional PCR [27-29] and may have been unnoticed in the former survey of *Wolbachia*  
86 infection in the tribe Naupactini [17].

87        The aim of the present study was to analyze the *Wolbachia* infection status in two bisexual  
88 species from the tribe Naupactini, to compare *Wolbachia* density of these weevils with  
89 parthenogenetic hosts carrying the same strain, and to investigate *Wolbachia* tissue localization in  
90 both parthenogenetic and sexually reproducing species. The two bisexual species were selected  
91 considering their abundance in nature and their economic importance. *Naupactus xanthographus*,  
92 known as “the fruit weevil”, causes severe damage on peach, nectarine, apple, berries, cherries, and

93 other deciduous fruit trees, as well as alfalfa, potatoes, soybean and other plants of commercial  
94 relevance [30]. Moreover, *N. xanthographus* causes damage in grape vineyards in the most productive  
95 areas of Chile, Argentina and Brazil. It is a quarantine pest in Japan and the USA [31] and several  
96 measures have been established to intercept this weevil from grape exports from Chile to Peru [32].  
97 On the other hand, *Naupactus dissimulator* causes damage on other important commercial crops like  
98 citrus species, yerba mate tea (*Ilex paraguariensis* Saint Hill) and peach, among others [30]. This  
99 information may be useful to increase knowledge on the dynamics of some components of the  
100 microbiota of pest weevils as well as the factors that modulate bacterial density as potential tools for  
101 Integrated Pest Management.

102

## 103 **2. Materials and methods**

### 104 **2.1. *Wolbachia* survey in bisexual species**

#### 105 **2.1.1. Sampling of biological material**

106 Both male and female adult specimens of *N. xanthographus* were collected in 14 locations from  
107 Argentina during the summer season of 2004-18, while *N. dissimulator* individuals were sampled in  
108 8 locations from Argentina and Brazil during the same period (S1 Table). *Wolbachia* infection  
109 status was determined in 1-2 individuals per location.

110 Samples were obtained using a beating sheet (0.55 x 0.55 cm). Specimens were stored at -20°C  
111 for DNA extraction.

#### 112 **2.1.2. *Wolbachia* detection and strain typing**

113 Total genomic DNA was extracted from adult weevils using the DNeasy Blood & Tissue Kit  
114 (Qiagen, Germany), following manufacturer instructions.

115 In addition, DNA from *Naupactus cervinus* and *Naupactus dissimilis* (sister species of *N.*  
116 *dissimulator* and *N. xanthographus*, respectively), both of them parthenogenetic and naturally

117 infected with *Wolbachia* [17] were used as positive controls. Both parthenogenetic (infected) and  
118 bisexual (uninfected) populations of *P. postfasciatus* [26] were also included in this study. Distilled  
119 water was used as negative control.

120 Bacterial presence in weevils was assessed with eubacterial specific primers for the *16S rRNA*  
121 gene [33]. *Wolbachia* infection was diagnosed through different genomic regions, using specific  
122 primers of the cytochrome C oxidase subunit I (*coxA*), aspartyl/glutamyl-tRNA amidotransferase  
123 subunit B (*gatB*), and *Wolbachia* surface protein (*wsp*) [34-35]. Finally, primers S1718 and A2442  
124 specific for the insect mitochondrial cytochrome C oxidase subunit I (*COI*) gene [36] were used to  
125 check the quality of the DNA extraction. Amplifications were carried out in a 15 µL final volume  
126 reaction containing 100 ng of genomic DNA used as template, 0.5 µM of each primer (Thermo Fisher  
127 Scientific, USA), 0.1 mM of each dNTP (GenBiotech, Argentina), 25 mM MgCl<sub>2</sub> (Thermo Fisher  
128 Scientific, USA), 1 unit of Taq polymerase (Thermo Fisher Scientific, USA) and 1X buffer (Thermo  
129 Fisher Scientific, USA). The reactions were performed on an Applied Biosystems Veriti thermal  
130 cycler under the conditions described in [37] for the *COI* gene, [34] for the *coxA* and *gatB* genes, and  
131 [35] for the *wsp* gene. In the case of the *16S rRNA* gene, the thermal conditions were those described  
132 in [33], but using 50° C as annealing temperature. PCR products were run on a 1% agarose gel with  
133 TAE buffer and visualized using GelRed® staining (GenBiotech S.R.L.). All experiments were  
134 repeated at least twice.

135 *Wolbachia* strains from *N. xanthographus* and *N. dissimulator* were characterized through  
136 amplification and sequencing of the *fbpA* gene, which is the most rapidly evolving of the five  
137 *Wolbachia* MLST genes, and then the most sensitive to detect the maximum diversity of *Wolbachia*  
138 strains [34,38-39]. Primers and thermal profiling were obtained from [34].

139 In addition, the *Wolbachia* infecting temperate phage was surveyed by sequencing the *orf7* locus  
140 from the WO phage. Primers and conditions described in [40] were used and reactions were  
141 performed in both bisexual species and in a parthenogenetic population of *P. postfasciatus*. In both

142 cases PCR amplifications were carried out as formerly described, but T-Holmes Taq polymerase kit  
143 (Inbio Highway, Argentina) was used because of its higher sensitivity, which allows detection of  
144 DNA at very low levels. PCR products were enzymatically purified using Exonuclease I (ExoI) and  
145 Thermosensitive Alkaline Phosphatase (FastAP) (Thermo Fisher Scientific, USA). Sequencing in  
146 both directions were performed in a 3130-XL Automatic Sequencer (Applied Biosystems). Sequences  
147 of the *fbpA* gene were compared with the *Wolbachia* MLST website. BLASTN sequence analyses were  
148 conducted to identify the *orf7* sequences.

## 149 **2.2. *Wolbachia* quantification in bisexual species**

### 150 **2.2.1. Sampling of biological material**

151 In order to measure *Wolbachia* levels in sexually reproducing Naupactini species and to compare  
152 these loads with that of a parthenogenetic control (*P. postfasciatus*), samples were collected during  
153 the summer season 2018-19. This parthenogenetic control was selected considering that the three  
154 species share the same *Wolbachia* strain (*wNau1*). Two locations were selected for each species  
155 (four specimens each, two males and two females). *N. dissimulator*: Buenos Aires City (hereafter,  
156 CABA) and Paulino Island; *N. xanthographus*: CABA and Pereyra Iraola Park; *P. postfasciatus*:  
157 CABA and Colonia (Uruguay). Specimens were managed as previously described (section 2.1.1).

### 158 **2.2.2. Real Time Quantitative PCR**

159 For relative quantification, *gatB* was used as target gene, while weevil's *ITS1* was selected as  
160 endogenous control gene. A nested PCR was optimized in order to increase sensitivity and  
161 specificity of the method. For both genes, an end-point PCR was performed as a first step using 100  
162 ng of total genomic DNA as template, followed by qPCR of the product.

163 End-point PCR was performed using the primers and thermal cycling conditions for *gatB* gene  
164 previously described (section 2.1.2). For the *ITS1* gene, the primers and conditions used were those  
165 described in [41].

166 Primers for *gatB* and *ITS1* genes suitable for qPCR analyses were designed using Primer3Plus  
167 software [42]. Primer sequences for *gatB* were based on the sequence of *w*Nau1 strain described in  
168 [17], whereas primer sequences for *ITS1* were designed using conserved regions of *ITS1* sequences  
169 from the three weevil species retrieved from GenBank (NCBI, NIH) (Table 1).

170

171 **Table 1. Oligonucleotide sequences of primers designed in this study for qPCR.**

172

| Primer pairs | Sequence                   | Position         |
|--------------|----------------------------|------------------|
| gatBqPCR-F   | 5'-CTGTGATGCAAATGTTTCT-3'  | 87 <sup>a</sup>  |
| gatBqPCR-R   | 5'-CTTATTTCTCCTCCGCTTT-3'  | 224 <sup>a</sup> |
| ITS1qPCR-F   | 5'-CGCTTATCCGGCCTAGTCG-3'  | 848 <sup>b</sup> |
| ITS1qPCR-R   | 5'-AGCGCTACTGTCCGTTTTGA-3' | 939 <sup>b</sup> |

173

174 <sup>a</sup>Positions are in accordance with the published sequence of the *gatB* gene of *w*Nau1 from  
175 *Pantomorus postfasciatus* (GenBank accession no. GU573910).

176 <sup>b</sup>Positions are in accordance with the published sequence of the *ITS1* gene of *Naupactus*  
177 *dissimulator* (GenBank accession no. JX440505).

178 PCR product size amplified with gatBqPCR-F/R is 157 bp.

179 PCR product size amplified with ITS1qPCR-F/R is 92 bp.

180

181 The qPCR reactions were conducted in a Step One Plus Real-Time PCR System (Thermo Fisher  
182 Scientific, USA) using the SYBR Green methodology. Reactions were prepared in 20  $\mu$ L total volume  
183 mixtures, consisted of 10  $\mu$ L SYBR™ Select Master Mix (Thermo Fisher Scientific, USA), 200 nM  
184 of each primer (Macrogen, Korea) and DNA template (1  $\mu$ L of ITS1 or *gatB* PCR product 500-fold



185 diluted). All qPCRs were run in triplicate and each run also included three replicates of a negative  
186 control with no added DNA template. The thermal cycling conditions for both genes were 95° C for  
187 2 min followed by 40 cycles of 95° C for 3 s and 60° C for 30 s. After that, melting curve analyses of  
188 the PCR products were performed. Standard curves were constructed using a qPCR amplicon  
189 obtained for each species serially 10-fold diluted. The qPCR amplification efficiency was calculated  
190 from the formula  $E = (10^{-1/S})$ , being S the slope of the linear fit in the standard curve [43]. The three  
191 species showed similar and adequately high efficiencies for both amplicons.

192 Relative *Wolbachia* levels were analyzed by the comparative Cq method [44], which  
193 standardizes target genes against an endogenous host gene and adjusts for differences in PCR  
194 efficiency between the amplicons, using the formula:

$$195 \quad \text{Ratio} = \frac{E^{\Delta Cq(Pp - sex)_{gatB}}}{E^{\Delta Cq(Pp - sex)_{ITS1}}} \quad (\text{Equation 1})$$

196 E= mean efficiency for each gene

197 Pp= mean Cq obtained for all *P. postfasciatus* individuals

198 sex= mean Cq obtained from the three replicates for each individual with sexual reproduction

### 199 **2.2.3. Data analyses**

200 Differences in *Wolbachia* relative quantification were analyzed through general linear mixed models  
201 with the library lme [45], using RStudio v. 1.2.5033 [46] and R software environment v. 3.0.1 [47].  
202 Normality of the data set was evaluated using the Shapiro-Wilk test, while homoscedasticity was  
203 evaluated graphically. In case of non-homoscedasticity, variance was modeled using varIdent. Both  
204 the Akaike Information Criterion (AIC) and Bayesian Information Criterion (BIC) were applied to  
205 select the best-fitting model. Analyses were carried out in two separate groups, including: (i) the  
206 whole dataset to evaluate the effect of the reproductive mode (n=24); (ii) *N. xanthographus* + *N.*  
207 *dissimulator* data to test the effect of the species, sex and location (n=16).

208 For (i), a model with the ratio obtained from Equation 1 as response variable, and reproductive  
209 mode as explanatory variable with fixed effects was applied. Geographic location was included as a  
210 random effect variable and was used to model variance.

211 For (ii), significance of explanatory variables (species, sex and location) was tested by  
212 dropping explanatory variables and their interactions from the models. Models considering the  
213 interactions among the explanatory variables did not fulfill the assumptions of normality and  
214 homoscedasticity, even after variance modeling. Sex was not considered in the final model because  
215 it has no significance ( $p > 0.05$ ) and both AIC and BIC values obtained were higher ( $AIC_{sp+loc+sex} = -$   
216  $79.607 > AIC_{sp+loc} = -100.133$ ;  $BIC_{sp+loc+sex} = -76.884 > BIC_{sp+loc} = -96.950$ ). An additive model  
217 with the ratio obtained from Equation 1 as response variable, and species and geographic location as  
218 explanatory variables with fixed effects was selected. Variance was modelled by geographic  
219 location. PCR plate was used as explanatory variable with random effects.

220 All charts were performed with the R software package v. 3.0.1 [47], using RStudio v. 1.2.5033  
221 [46].

## 222 **2.3. *Wolbachia* tissue localization**

### 223 **2.3.1. Biological material and dissection**

224 Adults from the three species studied herein were sampled in CABA (5 *N. dissimulator* females, 5  
225 *N. dissimulator* males, 3 *N. xanthographus* females and 3 parthenogenetic *P. postfasciatus*). They  
226 were conserved at  $-20^{\circ}$  C after collection and then dissected with a scalpel using a stereo-  
227 microscope (100 $\times$ ). Each body was separated in four: head (H), reproductive tissue (R), digestive  
228 tissue (D) and rest of the body (B). Each sample was conserved in absolute ethanol at  $-20^{\circ}$  C.

### 229 **2.3.2. DNA extraction and PCR**

230 Total genomic DNA was extracted using the REDEExtract-N-Amp<sup>TM</sup> Tissue PCR Kit (Sigma-  
231 Aldrich, USA), which yields high quantities of DNA. Samples were analyzed by end-point PCR for  
232 the *gatB* and the *16S rRNA* genes, as described in section 2.1.2. In addition, samples that resulted

233 negative in agarose gel for the *gatB* gene were re-analyzed using qPCR for this gene, as explained  
234 in section 2.3.2. All experiments were repeated at least twice.

235

## 236 **3. Results**

### 237 **3.1. *Wolbachia* survey in bisexual species**

238 *Wolbachia* infection was detected in 8 out of 14 geographic locations investigated for *N.*  
239 *xanthographus* (Fig 1) for all the genes assayed. In addition, it was found in individuals of *N.*  
240 *dissimulator* from most of the locations surveyed (7 out of 8) (Fig 1).

241

242 **Fig 1. Distribution of sampling sites of *Naupactus dissimulator* (circles) and**  
243 ***Naupactus xanthographus* (squares).** Colors indicate *Wolbachia* infection status at each  
244 sampling point (red, infected; blue, uninfected). For interpretation of the references to geographic  
245 locations in this figure, the reader is referred to the S1 Table.

246

247 In all cases, the bands observed in agarose gel were faint for both species, while parthenogenetic  
248 species used as positive controls showed intense bands for *Wolbachia* genes. Bisexual individuals  
249 of *P. postfasciatus* showed no *Wolbachia* DNA amplification (Fig 2A). On the other hand, the  
250 analysis of *16S rRNA* gene revealed the presence of intense bands for *N. xanthographus* and *N.*  
251 *dissimulator* (Fig 2B).

252

253 **Fig 2. End-point PCR results in agarose gel.** A) *Wolbachia gatB* gene; B) eubacterial *16S*  
254 *rRNA* gene; C) *orf7* locus from the *Wolbachia* WO phage. White line indicates a splicing in the gel.  
255 Lanes A and B: 1) DNA size marker; 2) *Naupactus cervinus* (parthenogenetic); 3) *Naupactus*  
256 *dissimulator* from Mburucuyá (bisexual, not infected); 4) *Naupactus dissimulator* from CABA

257 (bisexual, infected); 5) *Naupactus dissimilis* (parthenogenetic); 6) *Naupactus xanthographus* from La  
258 Falda (bisexual, not infected); 7) *Naupactus xanthographus* from Colón (bisexual, infected); 8)  
259 *Pantomorus posfasciatus* (parthenogenetic); 9) *Pantomorus posfasciatus* (bisexual, not infected).  
260 Lanes C: 1) *Pantomorus posfasciatus* (parthenogenetic); 2) *Naupactus dissimulator* (bisexual,  
261 infected); 3) *Naupactus xanthographus* (bisexual, infected); 4) DNA size marker.

262

263 Sequencing of *fbpA* gene showed that both bisexual species have the 181 allele, which belongs  
264 to wNau1 strain. The same strain was detected in most parthenogenetic populations of *P. postfasciatus*  
265 [26].

266 WO phage presence was revealed in the three species. While in parthenogenetic *P.*  
267 *postfasciatus* a single bright band in the gel was observed, both *N. dissimulator* and *N.*  
268 *xanthographus* showed multiple bands (Fig 2C). Sequencing of the *orf7* locus from *P. postfasciatus*  
269 confirmed identity with the WO phage (99.71% nucleotide identity with the WO capsid protein  
270 gene encoded by a *Wolbachia* strain from a butterfly native to India, GenBank accession no.  
271 FJ392499.1, E-value = 6e-174). The sequence obtained in the present study is available at GenBank  
272 (accession number MT526906).

273

### 274 **3.2. *Wolbachia* quantification in bisexual species**

275 The relative quantification obtained for *Wolbachia* in bisexual species was significantly lower than  
276 in parthenogenetic *P. postfasciatus* (Fig 3A).

277

278 **Fig 3. Relative *Wolbachia* levels ( $\log_{10}$  ratio) for weevils with different**  
279 **reproductive modes: *Naupactus dissimulator* and *Naupactus xanthographus***  
280 **(bisexual); and *Pantomorus postfasciatus* (parthenogenetic).** Thick horizontal lines

281 indicate median values, boxes the interquartile range (IQR), whiskers 1.5 times the IQR, and dots

282 show outlier values. *Wolbachia* loads were compared by reproductive mode for the three species (A);  
283 sex split by bisexual species (B); and geographic location of bisexual species (C).

284

285 Thus, reproductive mode has a significant effect on *Wolbachia* levels ( $p=0.0331$ ; estimated mean  
286 ratio for a bisexual population= $1.73 \times 10^{-4}$ ; DF=3).

287 The fold change due to reproductive mode was at least twice. Additionally, an elevated inter-  
288 individual variation in bacterial densities within bisexual species was detected.

289 When comparing within bisexual species, no significant effects were detected in *Wolbachia*  
290 loads related with species, sex or geographic location ( $p>0.05$ ) (Fig 3B-C).

291

### 292 **3.3. *Wolbachia* tissue localization in bisexual species**

293 *Wolbachia* was detected throughout the different tissues analyzed in all the species and sexes  
294 surveyed. These results are summarized in Table 2.

295

296 **Table 2. *Wolbachia* presence in different tissues in Naupactini species (*Naupactus*  
297 *dissimulator* and *Naupactus xanthographus* with sexual reproduction; and  
298 *Pantomorus postfasciatus* with parthenogenetic reproduction) expressed as  
299 **proportion of positive samples/total of individuals analyzed.** n: number of individuals;**

300 H: head; D: digestive tube; R: reproductive tissue; B: rest of the body.

301

|                               | n | H   | D   | R   | B   |
|-------------------------------|---|-----|-----|-----|-----|
| <i>N. dissimulator</i> female | 5 | 1   | 1   | 1   | 1   |
| <i>N. dissimulator</i> male   | 5 | 0.6 | 0.6 | 0.6 | 0.6 |

*N. xanthographus* female 3 1 0.7 1 1

*P. postfasciatus* female 3 1 1 1 1

---

302

303

304 Even though infection was not detected in some tissues from a few samples, there were no individuals  
305 presenting the same pattern, indicating a random distribution of negative results, and then inferred as  
306 false negatives. Thus, the infection seems to be spread in the whole body of individuals with both  
307 reproductive modes studied. In addition, the analyses of the *16S rRNA* gene suggested the presence  
308 of other bacteria in the same samples considering that multiple bands were observed in the agarose  
309 gel (similar to the *orf7* locus).

310

## 311 4. Discussion

312 *Wolbachia* infection was detected in bisexual species from the tribe Naupactini at very low levels.  
313 Both *N. dissimulator* and *N. xanthographus* host *wNau1* strain. This is not surprising, since it is the  
314 most widespread within the tribe Naupactini, including *Pantomorus postfasciatus*, *Naupactus minor*,  
315 among other species [17,26]. Then, *wNau1* has an elevated incidence rate and is efficiently  
316 transmitted within this tribe. These infections appear to be not fixed, since they were recorded only  
317 in some geographic locations for the two bisexual species, revealing a much more complex host-  
318 symbiont relationship than previously thought [17]. Similar low *Wolbachia* infection frequencies and  
319 low bacterial densities were described for populations of the bark beetle *Pityogenes chalcographus*  
320 (Curculionidae, Scolytinae) [27] and *Drosophila melanogaster* [48-49].

321 In *P. postfasciatus*, a species with both and parthenogenetic bisexual populations, *Wolbachia*  
322 infection is not fixed either, and the strain *wNau1* is spatially scattered (see Figure 1 in [26]). Contrary,  
323 in *N. xanthographus* and *N. dissimulator* *Wolbachia* infection appears to be uniformly widespread

324 throughout the geographic range of both species. The pattern found stimulates to deepen the study on  
325 *Wolbachia* dynamics in these species.

326 Additionally, we report for the first time the presence of the temperate phage WO in Naupactini  
327 weevils: *N. xanthographus*, *N. dissimulator* and *P. postfasciatus* yielded a positive diagnosis.  
328 Although the three of them share the same *Wolbachia* strain, their phages seems to be non-identical,  
329 as the agarose gel revealed a different band pattern between parthenogenetic and bisexual ones.  
330 Bordenstein et al. suggested that low *Wolbachia* densities might be caused by high densities of its  
331 associated bacteriophage [50]. Considering our results, this hypothesis deserves to be tested. Further  
332 studies will be conducted to deepen knowledge about phage WO in Naupactini.

333 *Naupactus xanthographus* is currently widespread in Argentina, whereas *N. dissimulator* is  
334 restricted to the gallery forests of Paraná and Uruguay rivers, down to the banks of La Plata River  
335 [30]. In this area, *N. dissimulator* coexists with its probable sister species, *N. cervinus* [37]. However,  
336 they do not share the same endosymbiont strain; *N. dissimulator* is infected with wNau1 strain, while  
337 *N. cervinus* carries wNau5. Something similar occurs with the sister species pair *N. xanthographus*-  
338 *N. dissimilis* (carrying wNau1 and wNau7, respectively [17]). This suggests that both wNau1 and  
339 wNau5 (or wNau1 and wNau7) were independently acquired. Coexistence of infected and uninfected  
340 populations also point to incipient, still-evolving processes, opposite to what was observed for older  
341 infections like that of *N. cervinus*, in which wNau5 is fixed [51]. Furthermore, these infections seem  
342 to be recent since wNau1 is shared for many distantly related hosts [17]. Multiple mechanisms of  
343 *Wolbachia* horizontal transmission have been proposed, including predators, parasitoids, hemolymph  
344 transfer, cohabitation, and foraging on the same host plants [52-55]. So far, in the case of weevils,  
345 mainly indirect evidence was provided of such transmissions [56-59].

346 Being primarily vertically transmitted, it is expected that the localization of *Wolbachia* would be  
347 restricted to the reproductive tissues. However, according to our results, these bacteria were not  
348 circumscribed to a specific tissue; instead, they are distributed throughout the whole body both in the

349 bisexual and the parthenogenetic species studied. These results reinforce the idea of recent horizontal  
350 transfer and are in agreement with previous observations in ants [60] and mosquitoes [61].

351 As it was mentioned before, the same *Wolbachia* strain was detected in both bisexual and  
352 unisexual species under study, but at significant lower densities in the former ones. No difference  
353 was found in bacterial titers between *N. dissimulator* and *N. xanthographus*, and regarding sex or  
354 geographic location, although they presented higher variability in *Wolbachia* loads among individuals  
355 than parthenogenetic *P. postfasciatus*. These results strengthen the hypothesis of a threshold level for  
356 *wNau1* strain, i.e. a minimum bacterial load necessary to induce the parthenogenetic phenotype.  
357 Several studies have pointed out the importance of a quantitative measure of *Wolbachia* to correlate  
358 the effects on host manipulation [5,11,15,62-64]. However, there are few reports specifically  
359 evaluating the relationship between *Wolbachia* titers and the parthenogenetic phenotype, and all of  
360 them are referred to Hymenoptera [65-68]. To the best of our knowledge, our contribution would be  
361 the first report for Coleoptera.

362 The pattern observed for the bisexual species would suggest that some populations are evolving  
363 towards endosymbiont loss. Alternatively, they could constitute an example of a persistent *Wolbachia*  
364 infection at low levels and frequencies, as in the bark beetle *P. chalcographus* [27]. Several studies  
365 have stated that microbial symbionts in eukaryotes are not transient passengers randomly acquired  
366 from the environment [3,69-72]. Then, a question that remains is which function has *Wolbachia* in  
367 bisexual species. It is likely that a yet unidentified beneficial fitness effect conserves this infection  
368 under certain environmental conditions, even at these low levels [27].

369 Another interesting topic is why the parthenogenetic phenotype is not triggered in these species.  
370 A possible explanation for the association between *Wolbachia* and parthenogenesis is the lesser  
371 ability of parthenogenetic weevils to rid themselves of *Wolbachia* infections once these happen  
372 [17,19]. Actually, it appears that no species is able to dispose of *Wolbachia*. Instead, as it was  
373 demonstrated in the present work, bisexual species are able to maintain the infection at low densities.



374 Then, they must have a mechanism to deal with such infection and consequently to impede  
375 parthenogenesis induction. Which could be this underlying mechanism?

376 First, *Wolbachia* levels might be modulated by proteins produced by the host. So far, several  
377 loci, either prokaryotic or eukaryotic, are known to play a role in the *in vivo* modulation of *Wolbachia*  
378 titer. This was demonstrated with experiments using hybrid hosts of the tsetse fly that strongly suggest  
379 that infected animals are actively controlling *Wolbachia* population dynamics [73]. In addition,  
380 another key inquiry is what environmental factors influence endosymbiont density. Among them,  
381 aspects related to host and endosymbiont metabolic and signaling pathways involved in nutrient  
382 sensing might be affecting *Wolbachia* levels [74]. These unexplored areas will be the origin of new  
383 research lines.

384 Another possible explanation is the presence of some other bacteria competing with *Wolbachia*,  
385 as suggested by the results obtained for the *16S rRNA* gene, i.e. bright bands, hint of many other  
386 bacteria besides *Wolbachia* (Fig 2). Symbioses are determined by highly dynamic interactions, both  
387 between the host and its symbionts, and among the different members of the symbiotic community  
388 [75]. It has been reported that conflict or incompatibility among microorganisms within arthropods,  
389 e.g. through competition for resources or space within the shared host, can shape their microbiome  
390 composition and could be a potential barrier to transmission of heritable symbionts [76]. Alternatively,  
391 particular taxa could provoke a host immune response, which in turn might affect the complete  
392 microbiota. There are few reports about interactions between *Wolbachia* and other bacteria, except  
393 for several binary interactions with other highly abundant symbionts. For instance, Goto et al. showed  
394 that male-killing *Spiroplasma* negatively affect *Wolbachia* titers in *D. melanogaster* [77], while  
395 Hughes et al. reported a mutual competitive exclusion between *Wolbachia* and *Asaia* in the  
396 reproductive organs of *Anopheles* mosquitoes [76]. Likewise, some still unidentified components of  
397 the microbiota in the bisexual species herein studied may out-compete *Wolbachia* either by a more  
398 efficient use of resources or by the production of some metabolite capable of regulating their levels.

399 It is possible that toxic effects, if any, of these unknown bacteria may provide clues to novel  
400 microbicidal mechanisms that may out-perform antibiotics. Under this hypothesis, these still  
401 unidentified components of the microbiota of species like *N. dissimulator* and *N. xanthographus*,  
402 should be absent in other species, such as *P. postfasciatus* and *N. cervinus*, for example, which display  
403 parthenogenesis at least in part of their ranges. This lack of specific bacteria could allow *Wolbachia*  
404 to proliferate and thereby surpass the threshold density in the latter species. Altogether, our findings  
405 add further support to the hypothesis of WIP in Naupactini weevils.

406 *Wolbachia*-microbiota interactions may be complex and dependent on both host and microbial  
407 composition. Future studies of high-throughput sequencing of the *16S rRNA* gene will be the starting  
408 point to test this hypothesis in both bisexual and unisexual species from Naupactini and to explore  
409 the microbiota composition of South American weevils.

410

## 411 **5. Acknowledgements**

412 Thanks are due to Dr Noelia Guzmán for *Naupactus xanthographus* DNA, to Dr  
413 Lucía Babino for statistical advice, and to Dr Agustin Elias-Costa for his valuable suggestion for  
414 designing Fig 2.

415

## 416 **6. References**

- 417 [1] López-Madrigal S, Duarte EH. Titer regulation in arthropod-*Wolbachia* symbioses. FEMS  
418 Microbiol Lett. 2019; 366(23): fnz232.
- 419 [2] Duron O, Hurst GD. Arthropods and inherited bacteria: from counting the symbionts to  
420 understanding how symbionts count. BMC Biol 2013; 11: 45.
- 421 [3] Werren JH, Baldo L, Clark ME. *Wolbachia*: master manipulators of invertebrate biology. Nat  
422 Rev Microbiol. 2008; 6(10): 741-751.

- 423 [4] Zug R, Hammerstein P. Bad guys turned nice? A critical assessment of *Wolbachia* mutualisms  
424 in arthropod hosts. *Biol Rev.* 2015; 90(1): 89-111.
- 425 [5] Osborne SE, Iturbe-Ormaetxe I, Brownlie JC, O'Neill SL, Johnson KN. Antiviral protection and  
426 the importance of *Wolbachia* density and tissue tropism in *Drosophila simulans*. *App Environ*  
427 *Microb.* 2012; 78(19): 6922-6929.
- 428 [6] Albertson R, Casper-Lindley C, Cao J, Tram U, Sullivan W. Symmetric and asymmetric mitotic  
429 segregation patterns influence *Wolbachia* distribution in host somatic tissue. *J Cell Sci.* 2009;  
430 122(24): 4570-4583.
- 431 [7] Cheng Q, Ruel TD, Zhou W, Moloo SK, Majiwa P, O'Neill SL, et al. Tissue distribution and  
432 prevalence of *Wolbachia* infections in tsetse flies, *Glossina* spp. *Med Vet Entomol.* 2000; 14(1):  
433 44-50.
- 434 [8] Frydman HM, Li JM, Robson DN, Wieschaus E. Somatic stem cell niche tropism in *Wolbachia*.  
435 *Nature.* 2006; 441(7092): 509-512.
- 436 [9] Schneider D, Miller WJ, Riegler M. Arthropods shopping for *Wolbachia*. In: Zchori-Fein E,  
437 Bourtzis K, editors. *Manipulative Tenants Bacteria associated with arthropods*. Boca Raton:  
438 CRC Press; 2011. pp. 149-173.
- 439 [10] Strunov A, Schneider DI, Albertson R, Miller WJ. Restricted distribution and lateralization of  
440 mutualistic *Wolbachia* in the *Drosophila* brain. *Cell Microbiol.* 2017; 19(1): e12639.
- 441 [11] Baião GC, Schneider DI, Miller WJ, Klasson L. The effect of *Wolbachia* on gene expression in  
442 *Drosophila paulistorum* and its implications for symbiont-induced host speciation. *BMC*  
443 *Genom.* 2019; 20(1): 465.
- 444 [12] Negri I, Franchini A, Gonella E, Daffonchio D, Mazzoglio PJ, Mandrioli M, et al. Unravelling  
445 the *Wolbachia* evolutionary role: the reprogramming of the host genomic imprinting. *P R Soc*  
446 *Lond B.* 2009; 276(1666): 2485-2491.

- 447 [13] Unckless RL, Boelio LM, Herren JK, Jaenike J. *Wolbachia* as populations within individual  
448 insects: causes and consequences of density variation in natural populations. P R Soc Lond B.  
449 2009; 276(1668): 2805-2811.
- 450 [14] Veneti Z, Clark ME, Karr TL, Savakis C, Bourtzis K. Heads or tails: host-parasite interactions  
451 in the *Drosophila-Wolbachia* system. App Environ Microbiol. 2004; 70(9): 5366-5372.
- 452 [15] Ma WJ, Pannebakker BA, van de Zande L, Schwander T, Wertheim B, Beukeboom LW.  
453 Diploid males support a two-step mechanism of endosymbiont-induced thelytoky in a parasitoid  
454 wasp. BMC Evol Biol. 2015; 15: 84.
- 455 [16] Pike N, Kingcombe R. Antibiotic treatment leads to the elimination of *Wolbachia*  
456 endosymbionts and sterility in the diplodiploid collembolan *Folsomia candida*. BMC Biol. 2009;  
457 7(1): 54.
- 458 [17] Rodriguero MS, Confalonieri VA, Guedes JVC, Lanteri AA. *Wolbachia* infection in the tribe  
459 Naupactini (Coleoptera, Curculionidae): association between thelytokous parthenogenesis and  
460 infection status. Insect Mol Biol. 2010; 19(5): 631–640.
- 461 [18] Rodriguero MS, Chifflet L, Monti DS, Elias-Costa AJ, Lanteri AA, Confalonieri VA.  
462 Prevalencia de *Wolbachia* y efectos del tratamiento con antibióticos en especies sudamericanas  
463 de gorgojos con modo mixto de reproducción: induce esta bacteria la partenogénesis telitóquica  
464 en especies de la tribu Naupactini? Abstract in IX Meeting of the Argentine Entomological  
465 Society. 2015.
- 466 [19] Son Y, Luckhart S, Zhang X, Lieber MJ, Lewis EE. Effects and implications of antibiotic  
467 treatment on *Wolbachia*-infected vine weevil (Coleoptera: Curculionidae). Agr Forest Entomol.  
468 2008; 10(2): 147-155.
- 469 [20] Timmermans MJ, Ellers J. *Wolbachia* endosymbiont is essential for egg hatching in a  
470 parthenogenetic arthropod. Evol Ecol. 2009; 23(6): 931-942.

- 471 [21] Ma WJ, Schwander T. Patterns and mechanisms in instances of endosymbiont-induced  
472 parthenogenesis. *J Evol Biol.* 2017; 30(5): 868-888.
- 473 [22] Rodriguero MS. Origen y consecuencias de la reproducción asexual en una especie de gorgojo  
474 de importancia agronómica. PhD Thesis. University of Buenos Aires. 2009.
- 475 [23] Rodriguero MS. *Wolbachia*, una pandemia con posibilidades. *Rev Soc Entomol Argent.*  
476 2013; 72(3-4): 117-137.
- 477 [24] Buchanan LL. The species of *Pantomorus* of America north of Mexico. USDA Misc Pub.  
478 1939; 341: 1-39.
- 479 [25] Lanteri AA, Normark BB. Parthenogenesis in tribe Naupactini (Coleoptera: Curculionidae).  
480 *Ann Entomol Soc Am.* 1995; 88: 722-731.
- 481 [26] Elias-Costa AJ, Confalonieri VA, Lanteri AA, Rodriguero MS. Game of clones: Is *Wolbachia*  
482 inducing speciation in a weevil with a mixed reproductive mode? *Mol Phylogenet Evol.*  
483 2019; 133: 42-53.
- 484 [27] Arthofer W, Riegler M, Avtzis DN, Stauffer C. Evidence for low-titre infections in insect  
485 symbiosis: *Wolbachia* in the bark beetle *Pityogenes chalcographus* (Coleoptera,  
486 Scolytinae). *Environ Microbiol.* 2009; 11(8): 1923-1933.
- 487 [28] Floate KD, Kyei-Poku GK, Coghlin PC. Overview and relevance of *Wolbachia* bacteria in  
488 biocontrol research. *Biocontrol Sci Techn.* 2006; 16: 767-788.
- 489 [29] Kyei-Poku GK, Colwell DD, Coghlin P, Benkel B, Floate KD. On the ubiquity and phylogeny  
490 of *Wolbachia* in lice. *Mol Ecol.* 2005; 14(1): 285-294.
- 491 [30] Lanteri AA, del Río MG. *Naupactus xanthographus* (Germar) species group (Curculionidae:  
492 Entiminae: Naupactini): a comprehensive taxonomic treatment. *J Nat Hist.* 2017; 51(27-28):  
493 1557-1587.

- 494 [31] Pinto L, Zaviezo T. Efectividad de bandas en base a aceites y polibuteno en el control del  
495 burrito de la vid *Naupactus xanthographus* (Coleoptera: Curculionidae). Cienc Investig Agrar.  
496 2003; 30(2): 69-77.
- 497 [32] SENASA-Perú and SAG-Chile. Plan de trabajo para el establecimiento de medidas de  
498 seguridad cuarentenaria, contra la falsa arañita roja de la vid (*Brevipalpus chilensis*, Baker) y el  
499 burrito de los frutales (*Naupactus xanthographus* (German)), en uva de mesa a exportarse desde  
500 Chile a Perú. 2005-2006. Available from:  
501 [https://www.senasa.gob.pe/senasa/descargasarchivos/2014/12/Plan-de-trabajo-uva-SAG-](https://www.senasa.gob.pe/senasa/descargasarchivos/2014/12/Plan-de-trabajo-uva-SAG-SENASA.pdf)  
502 [SENASA.pdf](https://www.senasa.gob.pe/senasa/descargasarchivos/2014/12/Plan-de-trabajo-uva-SAG-SENASA.pdf)
- 503 [33] O'Neill SL, Giordano R, Colbert AM, Karr TL, Robertson HM. 16S rRNA phylogenetic  
504 analysis of the bacterial endosymbionts associated with cytoplasmic incompatibility in  
505 insects. Proc Natl Acad Sci USA. 1992; 89(7): 2699-2702.
- 506 [34] Baldo L, Hotopp JCD, Jolley KA, Bordenstein SR, Biber SA, Choudhury RR, et al. Multilocus  
507 sequence typing system for the endosymbiont *Wolbachia pipientis*. Appl Environ Microbiol.  
508 2006; 72(11): 7098-7110.
- 509 [35] Braig HR, Zhou W, Dobson SL, O'Neill SL. Cloning and characterization of a gene encoding  
510 the major surface protein of the bacterial endosymbiont *Wolbachia pipientis*. J Bacteriol. 1998;  
511 180(9): 2373-2378.
- 512 [36] Normark BB. Phylogeny and evolution of parthenogenesis in the *Aramigus tessellatus* complex  
513 (Coleoptera: Curculionidae). PhD Thesis, Cornell University. 1994
- 514 [37] Scataglini MA, Lanteri AA, Confalonieri VA. Phylogeny of the *Pantomorus-Naupactus*  
515 complex based on morphological and molecular data (Coleoptera:Curculionidae). Cladistics.  
516 2005; 21(2): 131-142.
- 517 [38] Bailly-Bechet M, Martins-Simões P, Szöllösi GJ, Mialdea G, Sagot MF, Charlat S. How long  
518 does *Wolbachia* remain on board? Mol Biol Evol. 2017; 34(5): 1183-1193.

- 519 [39] Simoes PM, Mialdea G, Reiss D, Sagot MF, Charlat S. *Wolbachia* detection: an assessment of  
520 standard PCR protocols. *Mol Ecol Resour.* 2011; 11(3): 567-572.
- 521 [40] Masui S, Kamoda S, Sasaki T, Ishikawa H. Distribution and evolution of bacteriophage WO in  
522 *Wolbachia*, the endosymbiont causing sexual alterations in arthropods. *J Mol Evol.* 2000; 51(5):  
523 491-497.
- 524 [41] Rodriguero MS, Lanteri AA, Confalonieri VA. Speciation in the asexual realm: is the  
525 parthenogenetic weevil *Naupactus cervinus* a complex of species in *statu nascendi*? *Mol*  
526 *Phylogenet Evol.* 2013; 68(3): 644-656.
- 527 [42] Rozen S, Skaletsky H. Primer3 on the WWW for general users and for biologist programmers.  
528 *Methods Mol Biol.* 2000; 132: 365-386. Available from: [http://www.bioinformatics.nl/cgi-](http://www.bioinformatics.nl/cgi-bin/primer3plus/primer3plus.cgi/)  
529 [bin/primer3plus/primer3plus.cgi/](http://www.bioinformatics.nl/cgi-bin/primer3plus/primer3plus.cgi/)
- 530 [43] Rodríguez A, Rodríguez M, Córdoba JJ, Andrade MJ. Design of primers and probes for  
531 quantitative Real-Time PCR methods. In: Basu C, editors. *PCR Primer Design*. Springer; 2015.  
532 pp. 31-56.
- 533 [44] Pfaffl MW. A new mathematical model for relative quantification in real-time RT-  
534 PCR. *Nucleic Acids Res.* 2001; 29(9): e45-e45.
- 535 [45] Pinheiro J, Bates D, DebRoy S, Sarkar D, the R Core Team. nlme: Linear and Nonlinear Mixed  
536 Effects Models. R package version 3.1-144. 2020 [Cited 2020 April]. Available from:  
537 <https://CRAN.R-project.org/package=nlme>.
- 538 [46] RStudio Team. RStudio: Integrated Development for R. RStudio, Inc., Boston, MA. 2019  
539 [Cited 2020 April]. Available from: <http://www.rstudio.com/>.
- 540 [47] R Core Team. R: A language and environment for statistical computing. R Foundation for  
541 Statistical Computing, Vienna, Austria. 2019 [Cited 2020 April]. Available from:  
542 <https://www.R-project.org/>.

- 543 [48] Hoffmann AA, Hercus M, Dagher H. Population dynamics of the *Wolbachia* infection causing  
544 cytoplasmic incompatibility in *Drosophila melanogaster*. *Genetics*. 1998; 148: 221-231.
- 545 [49] Merçot H, Charlat S. *Wolbachia* infections in *Drosophila melanogaster* and *D. simulans*:  
546 polymorphism and levels of cytoplasmic incompatibility. *Genetica*. 2004; 120: 51-59.
- 547 [50] Bordenstein SR, Marshall ML, Fry AJ, Kim U, Wernegreen JJ. The tripartite associations  
548 between bacteriophage, *Wolbachia*, and arthropods. *PLoS Biol*. 2006; 2: 384-393.
- 549 [51] Rodriguero MS, Lanteri AA, Confalonieri VA. Mito-nuclear genetic comparison in a  
550 *Wolbachia* infected weevil: insights on reproductive mode, infection age and evolutionary forces  
551 shaping genetic variation. *BMC Evol Biol*. 2010; 10(1): 340.
- 552 [52] Ahmed MZ, Li SJ, Xue X, Yin XJ, Ren SX, Jiggins FM, et al. The intracellular bacterium  
553 *Wolbachia* uses parasitoid wasps as phoretic vectors for efficient horizontal transmission. *PLoS*  
554 *Pathog*. 2015; 11(2): e1004672.
- 555 [53] Huigens ME, De Almeida RP, Boons PAH, Luck RF, Stouthamer R.. Natural interspecific and  
556 intraspecific horizontal transfer of parthenogenesis–inducing *Wolbachia* in *Trichogramma*  
557 wasps. *P R Soc Lond B*. 2004; 271(1538): 509-515.
- 558 [54] Kolasa M, Montagna M, Mereghetti V, Kubisz D, Mazur MA, Kajtoch Ł. Preliminary  
559 evidence of the horizontal transmission of *Wolbachia* between *Crioceris* leaf beetles  
560 (Coleoptera: Chrysomelidae) and their *Asparagus* host plants. *Eur J Entomol*. 2017; 114: 446-  
561 454.
- 562 [55] Le Clec'h W, Chevalier FD, Genty L, Bertaux J, Bouchon D, Sicard M. Cannibalism and  
563 predation as paths for horizontal passage of *Wolbachia* between terrestrial isopods. *PloS One*.  
564 2013; 8(4): e60232.
- 565 [56] Kajtoch Ł, Kotásková N. Current state of knowledge on *Wolbachia* infection among  
566 Coleoptera: a systematic review. *PeerJ*. 2018; 6: e4471.



- 567 [57] Kotásková N, Kolasa M, Kajtoch Ł. Contrasting patterns of molecular diversity and *Wolbachia*  
568 infection in bisexual and parthenogenetic *Strophosoma* weevils (Coleoptera:  
569 Curculionidae). Entomol Sci. 2018; 21(4): 385-395.
- 570 [58] Mengoni Goñalons CM, Varone L, Logarzo G, Guala M, Rodriguero M, Hight SD, et al.  
571 Geographical range and laboratory studies on *Apanteles opuntiarum* (Hymenoptera: Braconidae)  
572 in Argentina, a candidate for biological control of *Cactoblastis cactorum* (Lepidoptera:  
573 Pyralidae) in North America. Fla Entomol. 2014; 97(4): 1458-1468.
- 574 [59] Rodriguero MS, Aquino DA, Loiácono MS, Elias-Costa AJ, Confalonieri VA, Lanteri AA.  
575 Parasitism of the Fuller's rose weevil *Naupactus cervinus* by *Microctonus* sp. in Argentina.  
576 BioControl. 2014; 59(5): 547-556.
- 577 [60] Frost CL, Pollock SW, Smith JE, Hughes WO. *Wolbachia* in the flesh: symbiont intensities in  
578 germ-line and somatic tissues challenge the conventional view of *Wolbachia* transmission  
579 routes. PLoS One. 2014; 9(7): e95122.
- 580 [61] Hughes GL, Koga R, Xue P, Fukatsu T, Rasgon JL. *Wolbachia* infections are virulent and  
581 inhibit the human malaria parasite *Plasmodium falciparum* in *Anopheles gambiae*. PLoS Pathog.  
582 2011; 7(5): e1002043.
- 583 [62] Bordenstein SR, Bordenstein SR. Temperature affects the tripartite interactions between  
584 bacteriophage WO, *Wolbachia*, and cytoplasmic incompatibility. PloS One. 2011; 6(12): e29106.
- 585 [63] Hurst GD, Johnson AP, von der Schulenburg JHG, Fuyama Y. Male-killing *Wolbachia* in  
586 *Drosophila*: a temperature-sensitive trait with a threshold bacterial density. Genetics.  
587 2000; 156(2): 699-709.
- 588 [64] Ikeda T, Ishikawa H, Sasaki T. Infection density of *Wolbachia* and level of cytoplasmic  
589 incompatibility in the Mediterranean flour moth, *Ephestia kuehniella*. J Invertebr Pathol.  
590 2003; 84(1): 1-5.

- 591 [65] Lindsey AR, Stouthamer R. Penetrance of symbiont-mediated parthenogenesis is driven by  
592 reproductive rate in a parasitoid wasp. *PeerJ*. 2017; 5: e3505.
- 593 [66] Pascal C, Pintureau B, Charles H, Katchadourian C, Grenier S, Bolland P., et al. Relationship  
594 between *Wolbachia* density and sex-ratio in a *Trichogramma* strain. *Agrociencia*. 2004; 8: 11-22.
- 595 [67] Tulgetzke GM, Stouthamer R. Characterization of intersex production in *Trichogramma kaykai*  
596 infected with parthenogenesis-inducing *Wolbachia*. *Naturwissenschaften*. 2012; 99(2): 143-152.
- 597 [68] Zchori-Fein E, Gottlieb Y, Coll M. *Wolbachia* density and host fitness components in  
598 *Muscidifurax uniraptor* (Hymenoptera: Pteromalidae). *J Invertebr Pathol*. 2000; 75: 267-272.
- 599 [69] Brucker RM, Bordenstein SR. The roles of host evolutionary relationships (genus: *Nasonia*)  
600 and development in structuring microbial communities. *Evolution*. 2012; 66(2), 349-362.
- 601 [70] Fraune S, Bosch TC. Why bacteria matter in animal development and evolution. *Bioessays*.  
602 2010; 32: 571-580.
- 603 [71] Lee YK, Mazmanian SK. Has the microbiota played a critical role in the evolution of the  
604 adaptive immune system? *Science*. 2010; 330: 1768-1773.
- 605 [72] McCutcheon JP, McDonald BR, Moran NA. Convergent evolution of metabolic roles in  
606 bacterial co-symbionts of insects. *Proc Nat Acad Sci USA*. 2009; 106: 15394-15399.
- 607 [73] Schneider DI, Garschall KI, Parker AG, Abd-Alla AM, Miller WJ. Global *Wolbachia*  
608 prevalence, titer fluctuations and their potential of causing cytoplasmic incompatibilities in tsetse  
609 flies and hybrids of *Glossina morsitans* subgroup species. *J Invertebr Pathol*. 2013; 112: S104-  
610 S115.
- 611 [74] Serbus LR, White PM, Silva JP, Rabe A, Teixeira L, Albertson R, et al. The impact of host diet  
612 on *Wolbachia* titer in *Drosophila*. *PLoS Pathog*. 2015; 11(3): e1004777.
- 613 [75] Dittmer J, Bouchon D. Feminizing *Wolbachia* influence microbiota composition in the  
614 terrestrial isopod *Armadillidium vulgare*. *Sci Rep*. 2018; 8(1): 1-12.

615 [76] Hughes GL, Dodson BL, Johnson RM, Murdock CC, Tsujimoto H, Suzuki Y, et al. Native  
616 microbiome impedes vertical transmission of *Wolbachia* in *Anopheles* mosquitoes. Proc Natl  
617 Acad Sci USA. 2014; 111(34): 12498-12503.

618 [77] Goto S, Anbutsu H, Fukatsu T. Asymmetrical interactions between *Wolbachia* and  
619 *Spiroplasma* endosymbionts coexisting in the same insect host. Appl Environ Microbiol.  
620 2006; 72(7): 4805-4810.

621

## 622 **7. Supporting information**

623 **S1 Table: Geographic distribution of *Naupactus dissimulator* (Nd) and *Naupactus***  
624 ***xanthographus* (Nx) sampling points.** Acronyms of locations shown in Fig 1, coordinates and  
625 presence of *Wolbachia* infection in weevils sampled are also presented for each site.

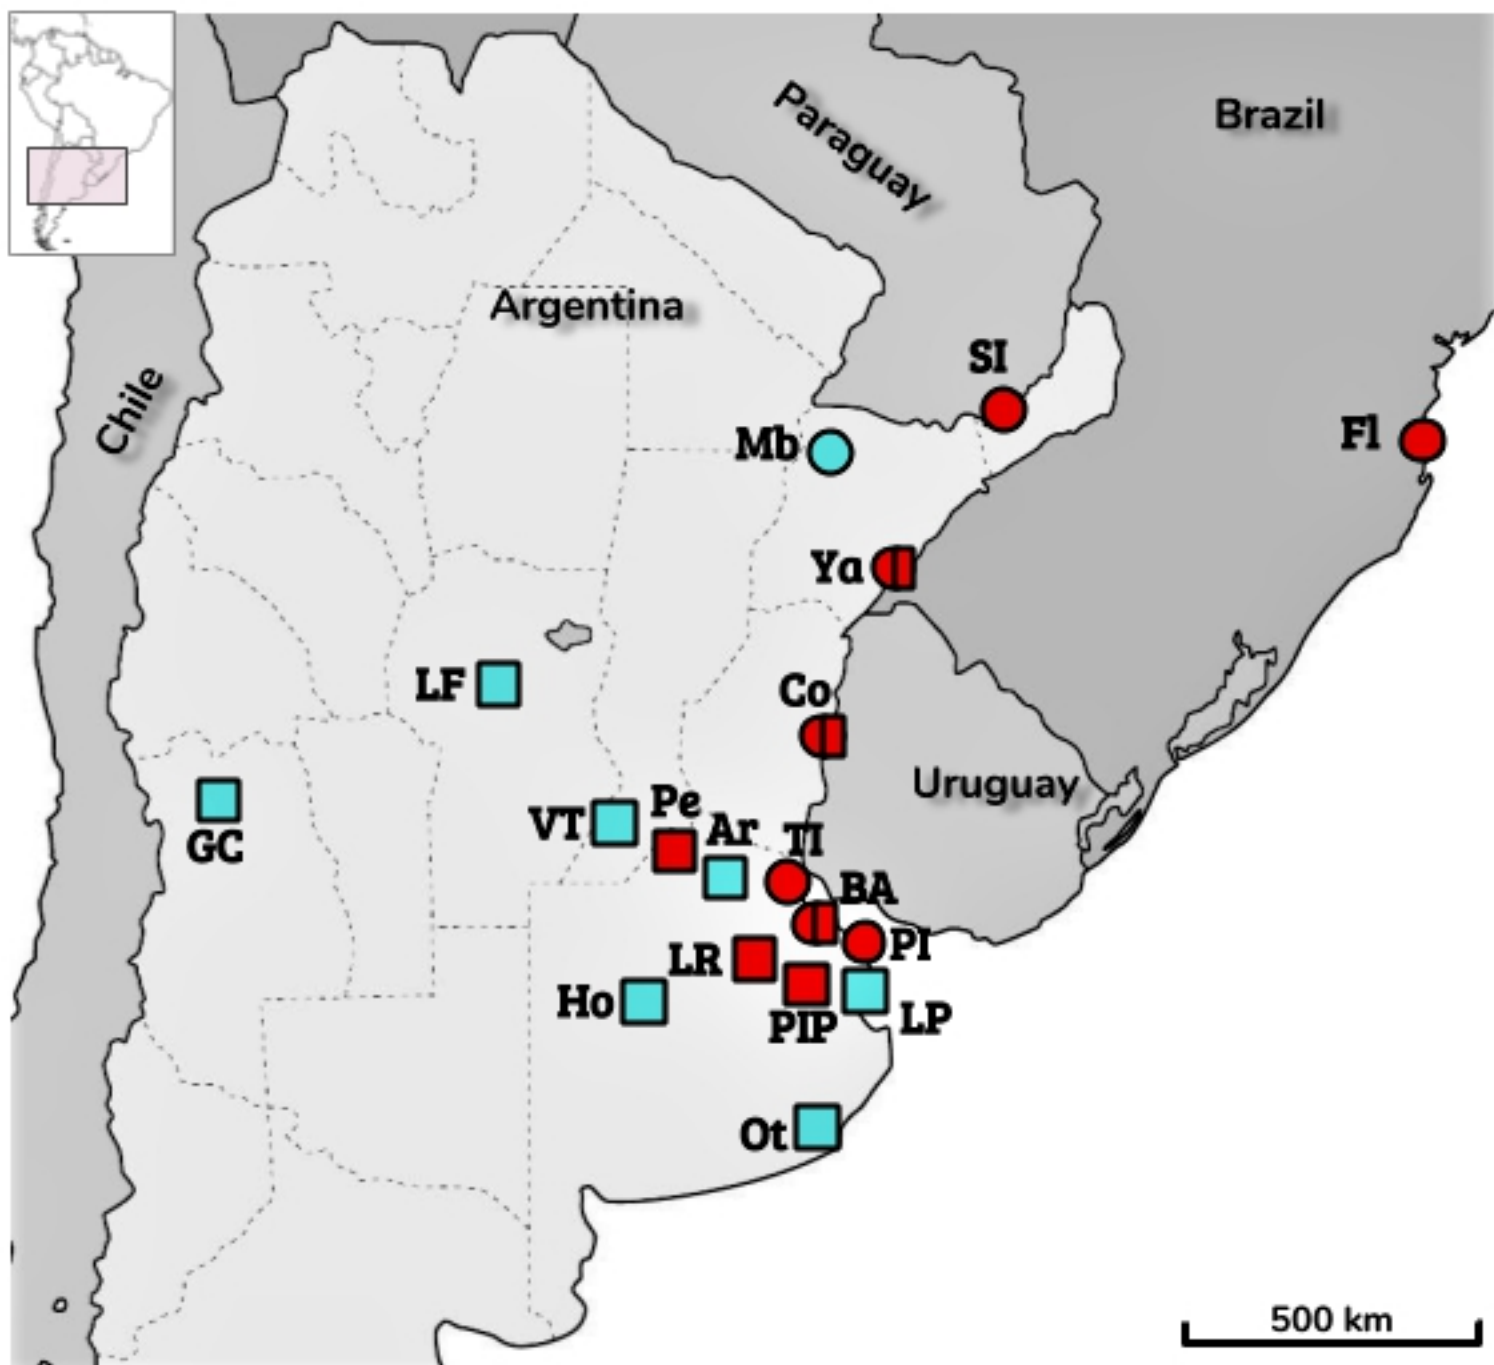

Figure 1

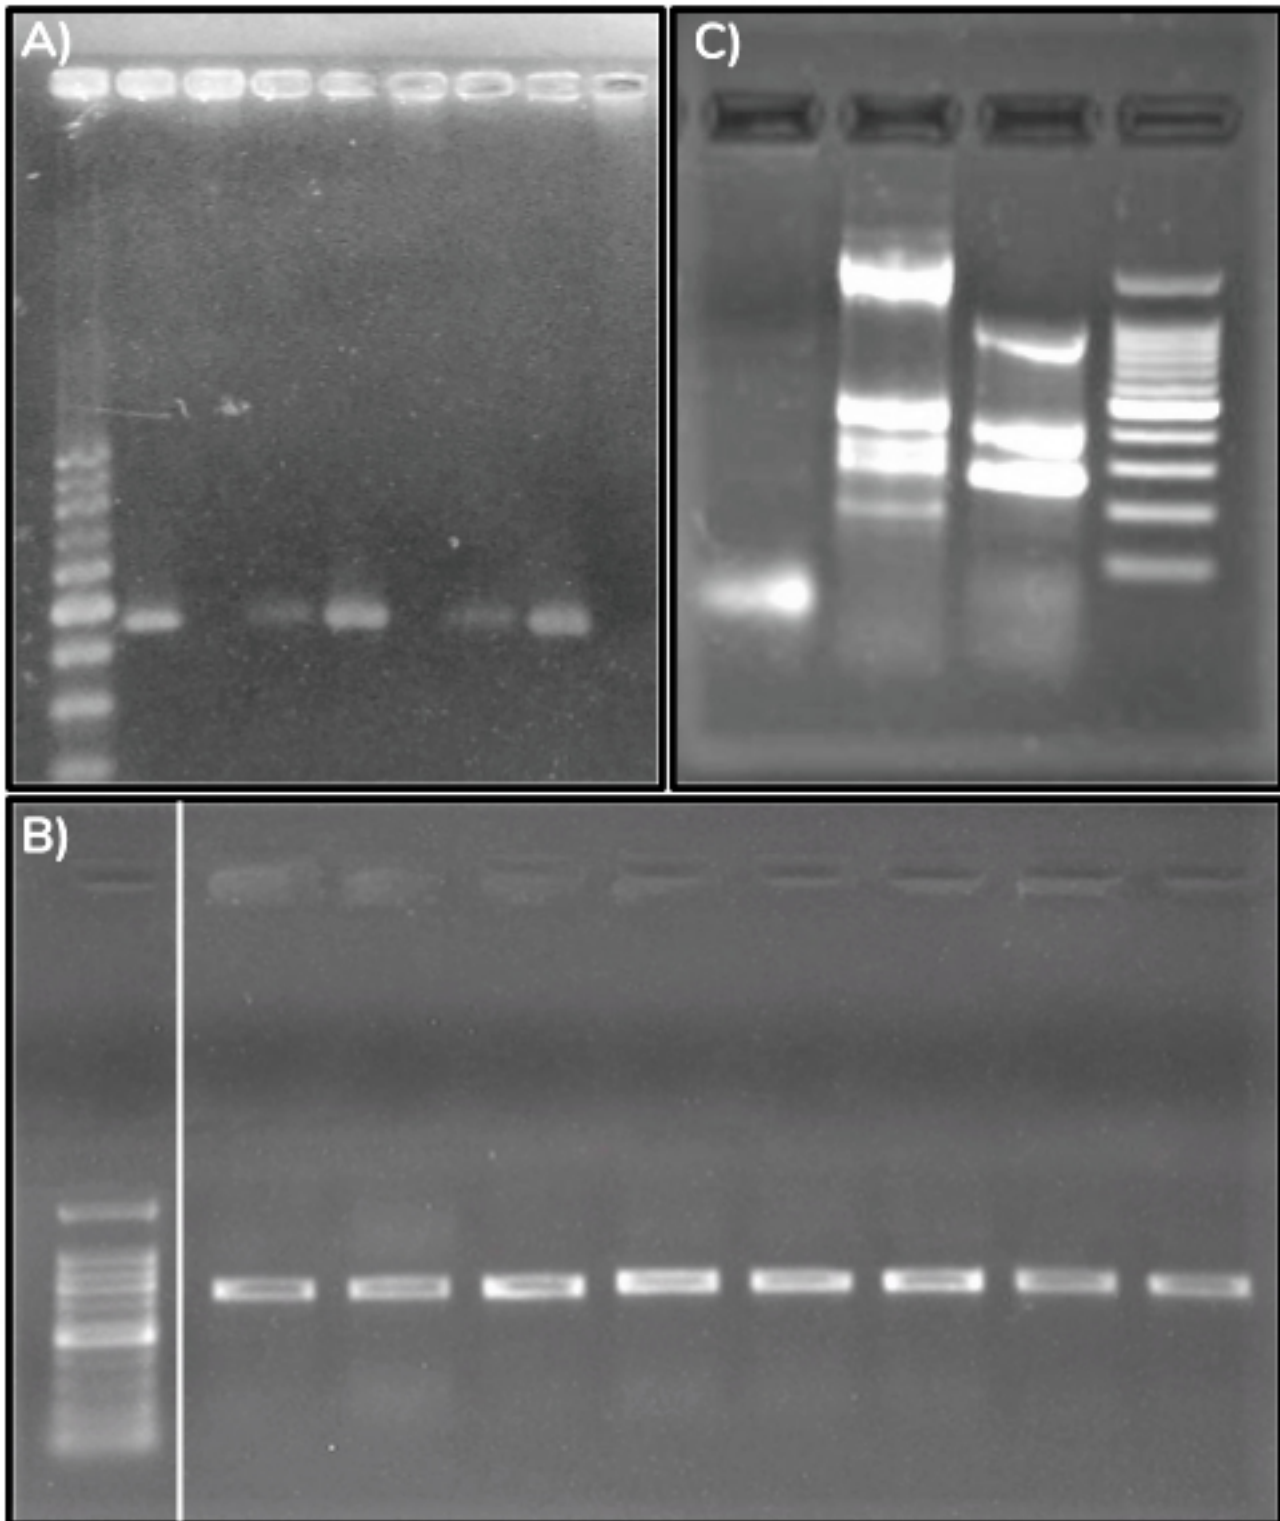

Figure 2

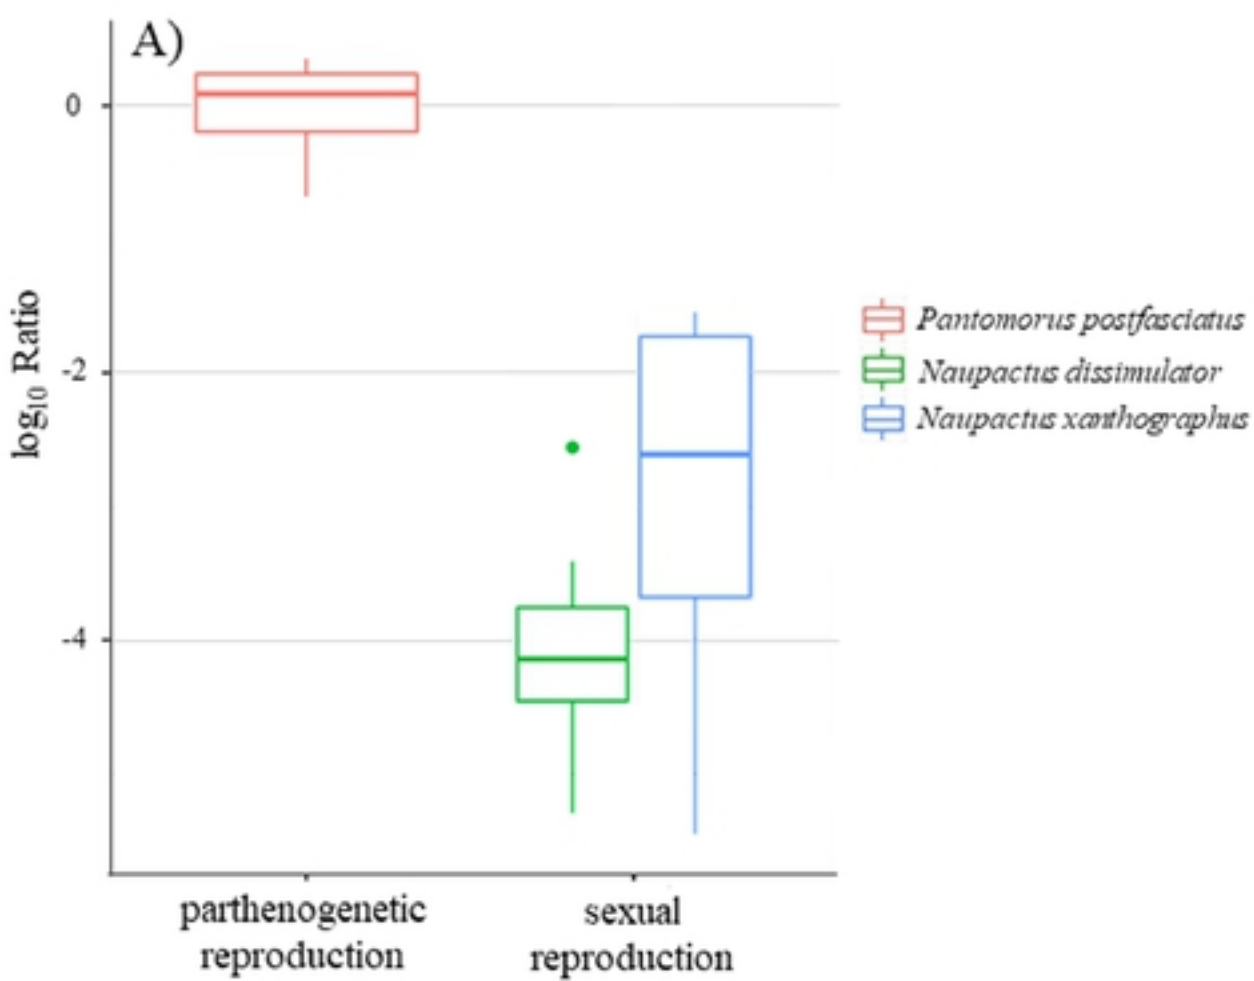

bioRxiv preprint doi: <https://doi.org/10.1101/2020.07.17.208447>; this version posted July 17, 2020. The copyright holder for this preprint (which was not certified by peer review) is the author/funder, who has granted bioRxiv a license to display the preprint in perpetuity. It is made available under aCC-BY 4.0 International license.

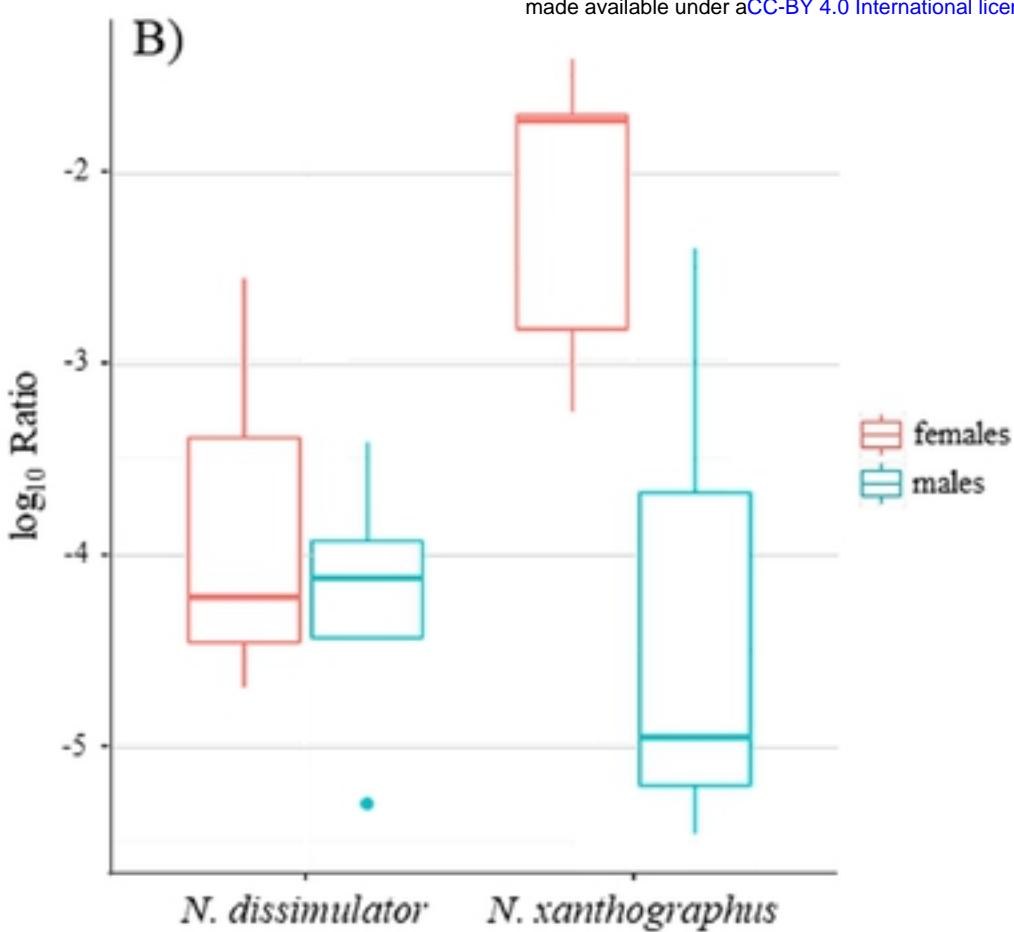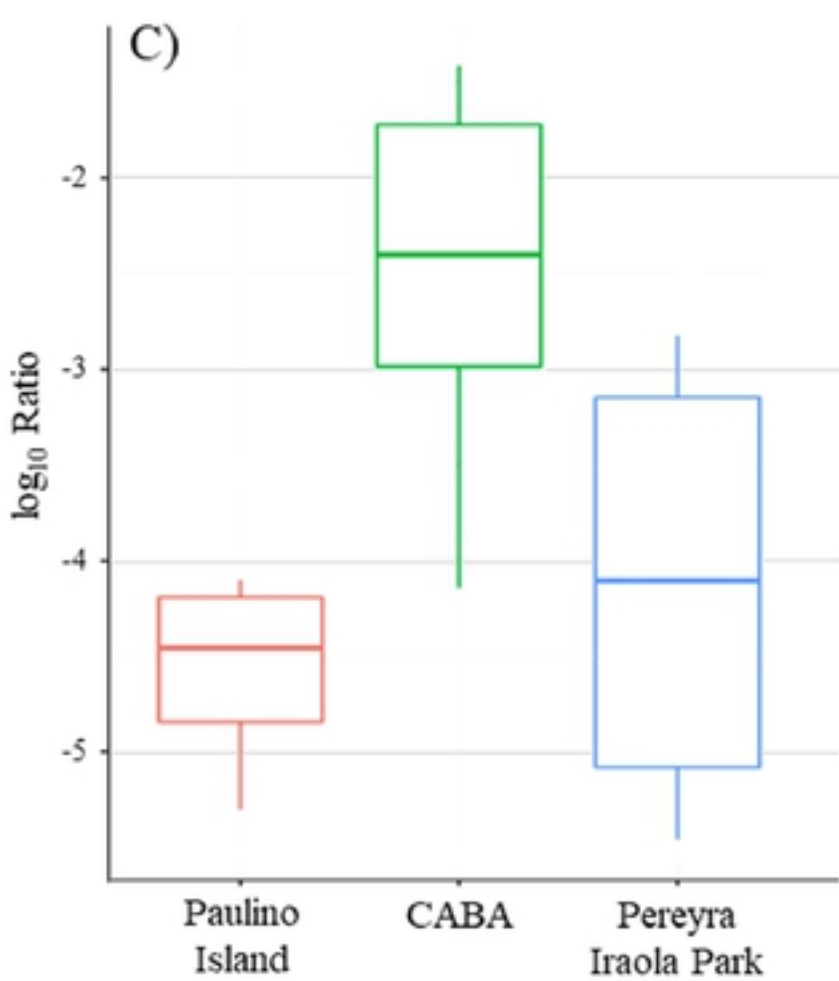

Figure 3
